# Supplementary material for: The free energy density of a crystal: calcite (CaCO3) as a case of study
Source: Royal Society of Chemistry journal article supplement (doi:10.1039/c4ce02203c), 2015-01-01
Supplement: c4ce02203c1.pdf [file c4ce02203c1.pdf]

## Electronic Supplementary Information

### The free energy density of a crystal: calcite ( $\text{CaCO}_3$ ) as a case of study

Marco Bruno

Dipartimento di Scienze della Terra - Università di Torino, via Valperga Caluso 35, I-10125 Torino, Italy.

**Table S1.** Static energy density at 0K ( $E_j^0$ ), and vibrational energy ( $E_j^{vib}$ ), vibrational entropy ( $S_j^{vib}$ ), vibrational free energy ( $A_j^{vib}$ ) and free energy ( $A_j$ ) density at 298.15K of the layers forming the (10.4) slab and (10.4) twinned slab of calcite. The percentage contribution of  $A_j^{vib}$  to  $A_j$  for each layer is also reported,  $\Delta(\%) = |A_j^{vib} / A_j| \times 100$ .

| layer               | distance (m)<br>$\times 10^{-9}$ | $E_j^0$ (J m $^{-3}$ )<br>$\times 10^{11}$ | $E_j^{vib}$ (J m $^{-3}$ )<br>$\times 10^9$ | $S_j^{vib}$ (J m $^{-3}$ K $^{-1}$ )<br>$\times 10^6$ | $A_j^{vib}$ (J m $^{-3}$ )<br>$\times 10^8$ | $A_j$ (J m $^{-3}$ )<br>$\times 10^{11}$ | $\Delta(\%)$ |
|---------------------|----------------------------------|--------------------------------------------|---------------------------------------------|-------------------------------------------------------|---------------------------------------------|------------------------------------------|--------------|
| (10.4) calcite      |                                  |                                            |                                             |                                                       |                                             |                                          |              |
| 10                  | 2.7304                           | -1.08627913                                | 1.66648400                                  | 2.76693830                                            | 8.41521370                                  | -1.07786392                              | 0.78         |
| 9                   | 2.4270                           | -1.10410384                                | 1.67381310                                  | 2.50661250                                            | 9.26466600                                  | -1.09483917                              | 0.85         |
| 8                   | 2.1236                           | -1.10327687                                | 1.66833300                                  | 2.48556120                                            | 9.27262930                                  | -1.09400424                              | 0.85         |
| 7                   | 1.8203                           | -1.10381440                                | 1.66883890                                  | 2.48152070                                            | 9.28973490                                  | -1.09452467                              | 0.85         |
| 6                   | 1.5169                           | -1.10370121                                | 1.66798850                                  | 2.48023590                                            | 9.28506220                                  | -1.09441614                              | 0.85         |
| 5                   | 1.2135                           | -1.10367507                                | 1.66782980                                  | 2.48037920                                            | 9.28304720                                  | -1.09439202                              | 0.85         |
| 4                   | 0.9101                           | -1.10381002                                | 1.66862050                                  | 2.48190990                                            | 9.28639130                                  | -1.09452363                              | 0.85         |
| 3                   | 0.6068                           | -1.10327669                                | 1.66816690                                  | 2.48572210                                            | 9.27048900                                  | -1.09400620                              | 0.85         |
| 2                   | 0.3034                           | -1.10410628                                | 1.67369350                                  | 2.50672630                                            | 9.26313010                                  | -1.09484315                              | 0.85         |
| 1                   | 0.0000                           | -1.08627627                                | 1.66638960                                  | 2.76699810                                            | 8.41409090                                  | -1.07786218                              | 0.78         |
| (10.4) twin calcite |                                  |                                            |                                             |                                                       |                                             |                                          |              |
| 24                  | 6.9777                           | -1.08618528                                | 1.65386561                                  | 2.77957296                                            | 8.25135960                                  | -1.07793392                              | 0.77         |
| 23                  | 6.6743                           | -1.10419944                                | 1.66921711                                  | 2.49797880                                            | 9.24444744                                  | -1.09495499                              | 0.84         |
| 22                  | 6.3709                           | -1.10316257                                | 1.66461259                                  | 2.47740912                                            | 9.25973088                                  | -1.09390284                              | 0.85         |
| 21                  | 6.0675                           | -1.10392802                                | 1.66696946                                  | 2.47180704                                            | 9.30000192                                  | -1.09462802                              | 0.85         |
| 20                  | 5.7641                           | -1.10350855                                | 1.66553155                                  | 2.46899424                                            | 9.29400912                                  | -1.09421454                              | 0.85         |
| 19                  | 5.4608                           | -1.10392174                                | 1.66846003                                  | 2.46894576                                            | 9.32343840                                  | -1.09459830                              | 0.85         |
| 18                  | 5.1574                           | -1.10345208                                | 1.66724110                                  | 2.46740232                                            | 9.31585104                                  | -1.09413623                              | 0.85         |
| 17                  | 4.8540                           | -1.10396653                                | 1.67211955                                  | 2.46909312                                            | 9.35959416                                  | -1.09460694                              | 0.86         |
| 16                  | 4.5506                           | -1.10332392                                | 1.67094420                                  | 2.46954936                                            | 9.34648032                                  | -1.09397744                              | 0.85         |
| 15                  | 4.2473                           | -1.10396728                                | 1.67988118                                  | 2.47537272                                            | 9.41848824                                  | -1.09454880                              | 0.86         |
| 14                  | 3.9439                           | -1.10326491                                | 1.67804436                                  | 2.48993928                                            | 9.35668944                                  | -1.09390822                              | 0.86         |
| 13                  | 3.6405                           | -1.10231481                                | 1.69743746                                  | 2.53939896                                            | 9.40315680                                  | -1.09291166                              | 0.86         |
| 12                  | 3.3371                           | -1.10114900                                | 1.70312242                                  | 2.56774032                                            | 9.37550616                                  | -1.09177350                              | 0.86         |
| 11                  | 3.0338                           | -1.10331296                                | 1.68166020                                  | 2.49500136                                            | 9.37775544                                  | -1.09393520                              | 0.86         |
| 10                  | 2.7304                           | -1.10393582                                | 1.68459778                                  | 2.48027088                                            | 9.45105048                                  | -1.09448477                              | 0.86         |
| 9                   | 2.4270                           | -1.10323849                                | 1.67313494                                  | 2.47169928                                            | 9.36197832                                  | -1.09387651                              | 0.86         |
| 8                   | 2.1236                           | -1.10398275                                | 1.67441383                                  | 2.47022736                                            | 9.37915584                                  | -1.09460360                              | 0.86         |
| 7                   | 1.8203                           | -1.10341126                                | 1.66832508                                  | 2.46778440                                            | 9.32555208                                  | -1.09408571                              | 0.85         |
| 6                   | 1.5169                           | -1.10393764                                | 1.66950542                                  | 2.46913176                                            | 9.33333768                                  | -1.09460430                              | 0.85         |
| 5                   | 1.2135                           | -1.10348907                                | 1.66598789                                  | 2.46892872                                            | 9.29876808                                  | -1.09419030                              | 0.85         |
| 4                   | 0.9101                           | -1.10393618                                | 1.66734840                                  | 2.47202184                                            | 9.30315072                                  | -1.09463303                              | 0.85         |
| 3                   | 0.6068                           | -1.10314830                                | 1.66463138                                  | 2.47767552                                            | 9.25912416                                  | -1.09388917                              | 0.85         |
| 2                   | 0.3034                           | -1.10421076                                | 1.66899295                                  | 2.49962760                                            | 9.23728944                                  | -1.09497347                              | 0.84         |
| 1                   | 0.0000                           | -1.08617138                                | 1.65284431                                  | 2.79444816                                            | 8.19679584                                  | -1.07797458                              | 0.76         |

**Table S2.** Static energy density at 0K ( $E_j^0$ ), and vibrational energy ( $E_j^{vib}$ ), vibrational entropy ( $S_j^{vib}$ ), vibrational free energy ( $A_j^{vib}$ ) and free energy ( $A_j$ ) density at 298.15K of the layers forming the (10.0) and (01.2) slabs of calcite. The percentage contribution of  $A_j^{vib}$  to  $A_j$  for each layer is also reported,  $\Delta(\%) = |A_j^{vib} / A_j| \times 100$ .

| layer          | distance (m)<br>$\times 10^{-9}$ | $E_j^0$ (J m <sup>-3</sup> )<br>$\times 10^{11}$ | $E_j^{vib}$ (J m <sup>-3</sup> )<br>$\times 10^9$ | $S_j^{vib}$ (J m <sup>-3</sup> K <sup>-1</sup> )<br>$\times 10^6$ | $A_j^{vib}$ (J m <sup>-3</sup> )<br>$\times 10^8$ | $A_j$ (J m <sup>-3</sup> )<br>$\times 10^{11}$ | $\Delta(\%)$ |
|----------------|----------------------------------|--------------------------------------------------|---------------------------------------------------|-------------------------------------------------------------------|---------------------------------------------------|------------------------------------------------|--------------|
| (10.0) calcite |                                  |                                                  |                                                   |                                                                   |                                                   |                                                |              |
| 15             | 6.0396                           | -1.08758566                                      | 1.71698130                                        | 2.56216725                                                        | 9.53071125                                        | -1.07805495                                    | 0.88         |
| 14             | 5.6082                           | -1.10283636                                      | 1.67282340                                        | 2.51254755                                                        | 9.23707305                                        | -1.09359929                                    | 0.84         |
| 13             | 5.1768                           | -1.10432252                                      | 1.67372220                                        | 2.48931855                                                        | 9.31531800                                        | -1.09500720                                    | 0.85         |
| 12             | 4.7454                           | -1.10364477                                      | 1.67317290                                        | 2.48824335                                                        | 9.31303140                                        | -1.09433174                                    | 0.85         |
| 11             | 4.3140                           | -1.10368145                                      | 1.67309145                                        | 2.48624130                                                        | 9.31818570                                        | -1.09436326                                    | 0.85         |
| 10             | 3.8826                           | -1.10373614                                      | 1.67298090                                        | 2.48674305                                                        | 9.31558470                                        | -1.09442055                                    | 0.85         |
| 9              | 3.4512                           | -1.10370042                                      | 1.67298675                                        | 2.48610255                                                        | 9.31755210                                        | -1.09438287                                    | 0.85         |
| 8              | 3.0198                           | -1.10373810                                      | 1.67293875                                        | 2.48659875                                                        | 9.31559340                                        | -1.09442250                                    | 0.85         |
| 7              | 2.5884                           | -1.10369871                                      | 1.67298660                                        | 2.48610525                                                        | 9.31754325                                        | -1.09438117                                    | 0.85         |
| 6              | 2.1570                           | -1.10373709                                      | 1.67298075                                        | 2.48674815                                                        | 9.31556850                                        | -1.09442152                                    | 0.85         |
| 5              | 1.7256                           | -1.10368001                                      | 1.67309130                                        | 2.48624910                                                        | 9.31816140                                        | -1.09436185                                    | 0.85         |
| 4              | 1.2942                           | -1.10364363                                      | 1.67317275                                        | 2.48825385                                                        | 9.31299840                                        | -1.09433063                                    | 0.85         |
| 3              | 0.8628                           | -1.10432207                                      | 1.67372190                                        | 2.48933235                                                        | 9.31527420                                        | -1.09500680                                    | 0.85         |
| 2              | 0.4314                           | -1.10283769                                      | 1.67282295                                        | 2.51256600                                                        | 9.23701395                                        | -1.09360068                                    | 0.84         |
| 1              | 0.0000                           | -1.08758666                                      | 1.71698085                                        | 2.56219395                                                        | 9.53062650                                        | -1.07805604                                    | 0.88         |
| (01.2) calcite |                                  |                                                  |                                                   |                                                                   |                                                   |                                                |              |
| 12             | 4.2351                           | -1.08337845                                      | 1.69848072                                        | 2.57346060                                                        | 9.31203480                                        | -1.07406642                                    | 0.87         |
| 11             | 3.8501                           | -1.10417181                                      | 1.67263656                                        | 2.50128888                                                        | 9.26877276                                        | -1.09490304                                    | 0.85         |
| 10             | 3.4651                           | -1.10439124                                      | 1.67364972                                        | 2.49064680                                                        | 9.31063428                                        | -1.09508061                                    | 0.85         |
| 9              | 3.0801                           | -1.10367954                                      | 1.67300292                                        | 2.48944932                                                        | 9.30773652                                        | -1.09437180                                    | 0.85         |
| 8              | 2.6951                           | -1.10375655                                      | 1.67317584                                        | 2.48810484                                                        | 9.31347360                                        | -1.09444307                                    | 0.85         |
| 7              | 2.3101                           | -1.10371379                                      | 1.67307252                                        | 2.48794440                                                        | 9.31291932                                        | -1.09440087                                    | 0.85         |
| 6              | 1.9250                           | -1.10370004                                      | 1.67308332                                        | 2.48795592                                                        | 9.31299216                                        | -1.09438705                                    | 0.85         |
| 5              | 1.5400                           | -1.10373861                                      | 1.67318376                                        | 2.48808732                                                        | 9.31360536                                        | -1.09442500                                    | 0.85         |
| 4              | 1.1550                           | -1.10366524                                      | 1.67300856                                        | 2.48943384                                                        | 9.30783804                                        | -1.09435740                                    | 0.85         |
| 3              | 0.7700                           | -1.10452138                                      | 1.67365368                                        | 2.49064368                                                        | 9.31068240                                        | -1.09521070                                    | 0.85         |
| 2              | 0.3850                           | -1.10415941                                      | 1.67263920                                        | 2.50129644                                                        | 9.26877648                                        | -1.09489063                                    | 0.85         |
| 1              | 0.0000                           | -1.08336646                                      | 1.69847868                                        | 2.57349252                                                        | 9.31191864                                        | -1.07405454                                    | 0.87         |
